# Supplementary material for: Cytosolic co-delivery of miRNA-34a and docetaxel with core-shell nanocarriers via caveolae-mediated pathway for the treatment of metastatic breast cancer
Source: PubMed Central journal article supplement (PMC5382875; doi:10.1038/srep46186), 2017-04-06
Supplement: srep46186-s1.pdf [file srep46186-s1.pdf]

1 *Supplementary Information*

2 **Cytosolic co-delivery of miRNA-34a and docetaxel with core-shell**  
3 **nanocarriers via caveolae-mediated pathway for the treatment of**  
4 **metastatic breast cancer**

5 Li Zhang, Xin Yang, Yaqi Lv, Xiaofei Xin, Chao Qin, Xiaopeng Han, Lei Yang, Wei He\*, Lifang  
6 Yin\*

7

8 Department of Pharmaceutics, School of Pharmacy, China Pharmaceutical University, Nanjing  
9 210009, PR China

10

11

12 \*Corresponding authors: Wei He and Lifang Yin

13 E-mail address: [weihe@cpu.edu.cn](mailto:weihe@cpu.edu.cn) (W. He), [lifangyin\\_@163.com](mailto:lifangyin_@163.com) (L. Yin)

14

## 15 **Methods**

16 **Materials.** DTX was purchased from Jiangsu Yew Pharmaceutical Co., Ltd. (Wuxi, China).  
17 Mmu-miRNA-34a mimics and Cy5-labeled miRNA-34a (Cy5-RNA) were purchased from RiboBio  
18 Co., Ltd. (Guangzhou, China). Labrafil<sup>®</sup> M 1944 CS (oleoyl macroglycerides) was obtained  
19 from Gattefossé (Saint-Priest Cedex, France). Egg phospholipid (EP) was purchased from  
20 Sinopharm Chemical Reagent Co., Ltd. (Shanghai, China).  
21 1-Ethyl-3-(3-dimethylaminopropyl)-carbodiimide hydrochloride (EDC), bovine serum albumin  
22 (BSA), coumarin-6 (C6), 4,6-diamidino-2-phenylindole (DAPI) and  
23 3-(4,5-dimethyl-2-thiazolyl)-2,5-diphenyl-tetrazolium bromide (MTT) were purchased from  
24 Sigma-Aldrich (St. Louis, MO, USA). AnnexinV-FITC/PI apoptosis detection kits were purchased  
25 from Beyotime Institute of Biotechnology (Haimen, China). LysoTracker and Cholera Toxin  
26 Subunit B (CTB)-Alexa Fluors<sup>®</sup> 488 (or 594) were obtained from Invitrogen (Eugene, Oregon,  
27 USA). Anti-caveolin-1 antibody-Caveolae Marker (Alexa Fluors<sup>®</sup> 488 or 594) was purchased from  
28 Abcam (Cambridge, UK). Fetal bovine serum (FBS), trypsin, Roswell Park Memorial Institute  
29 (RPMI) 1640 medium, Dulbecco's modified Eagle's minimal essential medium (DMEM),  
30 non-essential amino acids, L-glutamine, penicillin and streptomycin were purchased from Thermo  
31 Fisher Scientific Inc. (Waltham, MA, USA). All other chemicals were of analytical grade,  
32 commercially available and used without further purification.

33 **Cell culture and animals.** Murine breast cancer (4T1), human lung adenocarcinoma (A549) and  
34 human colon carcinoma (Caco-2) cells were purchased from KeyGEN Biotech Co., Ltd. (Nanjing,  
35 China). 4T1 and A549 cells were cultured in RPMI 1640 medium supplemented with 10% FBS,  
36 100 µg/mL streptomycin and 100 U/mL penicillin. Caco-2 cells were cultured in DMEM  
37 supplemented with 10% FBS, 1% non-essential amino acids, 1% L-glutamine, 100 µg/mL  
38 streptomycin and 100 U/mL penicillin. All cells were cultured in an incubator at 37 °C with a  
39 humidified atmosphere of 5% CO<sub>2</sub>. Female Sprague–Dawley (SD) rats (200-250 g) and BALB/c  
40 mice (18-22 g) were purchased from the College of Veterinary Medicine of Yangzhou University  
41 (Yangzhou, China). The animals were fed at the condition of 25 °C and 55% of humidity in an SPF

42 class animal facility. The animals used in the experiments received care in compliance with the  
43 Principles of Laboratory Animal Care and the Guide for the Care and Use of Laboratory Animals.  
44 All the animal experiments were performed in accordance with the protocol approved by the China  
45 Pharmaceutical University Institutional Animal Care and Use Committee.

46 **Synthesis of CBSA.** CBSA was synthesized from BSA by modification with ethylenediamine as  
47 described previously (**Supplementary Fig. S1**)<sup>1</sup>. Briefly, 5 mL of 20% (w/v) BSA solution was  
48 slowly added to 125 mL of an ethylenediamine solution (0.9 M, pH 4.75) under stirring.  
49 Subsequently, 200 mg of EDC was added, and then, the mixture was stirred at room temperature for  
50 2 h. The reaction was quenched by the addition of 650  $\mu$ L acetate buffer (4 M, pH 4.75). Then, the  
51 reaction solution was concentrated to approximately 10 mL by a protein concentrator (Thermo  
52 Fisher, USA)), followed by dialysis against distilled water using a dialysis bag (MWCO 3500) for  
53 72 h, and finally freeze-dried to obtain CBSA. BSA and CBSA were characterized by isoelectric  
54 focusing (IEF).

55 **Characterization of core-shell nanocarriers.**

56 **Morphology.** The morphologies of the BNCs, DNCs and CNCs were investigated using a  
57 transmission electron microscope (TEM). The nanocarrier samples were diluted appropriately in  
58 distilled water, and one drop was placed on a carbon-coated copper grid, followed by air drying and  
59 staining with 2% (w/v) phosphotungstic acid for 30 s at room temperature for contrast enhancement.  
60 Finally, the sample was observed by TEM (JEM-1230, Tokyo, Japan) after air drying.

61 **Particle size, size distribution and zeta potential.** The particle size, size distribution and zeta  
62 potential of the BNCs, DNCs and CNCs were measured using a Zetasizer 3000 HSA (Malvern  
63 Instruments Ltd., UK) according to the dynamic light scattering (DLS) principle. The samples were  
64 diluted appropriately in distilled water before measurement. Determinations were performed at 633  
65 nm with a constant scattering angle of 90° at 25 °C. The size distribution was indicated by the  
66 polydispersity index (PDI), and the raw data were expressed by the intensity-weighted Gaussian  
67 distribution (with Chi-squared value < 3). Each batch was carried out in triplicate.

68 **Core-shell structure confirmation.** The core-shell structure of nanocarriers was confirmed by  
69 confocal laser scanning microscopy (CLSM). Dual fluorescence-labeled microscale carriers labeled

70 with C6 and rhodamine B isothiocyanate (RBITC) were prepared using a procedure similar to the  
71 fabrication of BNCs. Briefly, the oil phase containing C6 (0.3 mg), EP (100 mg) and Labrafil<sup>®</sup> M  
72 1944 CS (1 mL) was added to the aqueous phase containing 30 mL of 1.0% (w/v) RBITC-labeled  
73 CBSA and followed by dispersing at 10 000 rpm for 60 s using a high-speed disperser as described  
74 above. The suspension was diluted appropriately in distilled water and one drop of the sample was  
75 placed on the surface of a glass slide. After covering with a cover slip, the sample was observed by  
76 CLSM (Zeiss LSM 700, Germany).

77 **RNA binding ability and protection assay.** The RNA binding ability and protection of CBSA in  
78 the core-shell nanocarriers was investigated by agarose gel electrophoresis<sup>2,3</sup>. Briefly, CNCs were  
79 prepared at various weight ratios of CBSA/RNA (0.125, 1, 8, 32, 64, 128, 200 and 400). The  
80 samples were mixed with 5× loading buffer containing GelRed (Generay Biotechnology, China)  
81 and then electrophoresed on 2% (w/v) agarose gel in TBE buffer at 110 V for 10 min. Subsequently,  
82 the gel was photographed using chemiluminescence imaging system (ChemiDoc<sup>™</sup> XRS+,  
83 Bio-Rad, USA).

84 To evaluate the protection for miRNA-34a against RNase A degradation by CNCs, free  
85 miRNA-34a (0.5 μg) and CNCs (containing 0.5 μg miRNA-34a) were incubated with RNase A  
86 (final concentration 10 μg/mL) at 37 °C for the indicated times. The resulting samples were  
87 terminated by incubation with SDS (final concentration 1%) for 5 min at 60 °C, and then heparin  
88 (final concentration 2%) was added to the samples to displace miRNAs from CNCs. Finally, the  
89 samples were analyzed by agarose gel electrophoresis as described above.

90 To assess the serum stability of miRNA-34a in CNCs, free miRNA-34a (0.5 μg) and CNCs  
91 (containing 0.5 μg miRNA-34a) were incubated in 10% FBS solution (final concentration) at 37 °C  
92 for the indicated periods. Then, the samples were picked out, processed according to the procedure  
93 described above and finally analyzed by agarose gel electrophoresis.

94 **Differential scanning calorimetry (DSC) and powder X-ray diffraction (PXRD).** To confirm  
95 the physical state of the DTX in the nanocarriers, DSC was performed using DSC (Q2000, TA  
96 Instruments, USA). The samples of pure DTX, CBSA, their physical mixture (PM), trehalose  
97 (protectant during freezing) and freeze-dried DNCs were sealed in aluminum pans and heated from

98 25-300 °C at a rate of 10 °C/min under dry nitrogen atmosphere with a flow rate of 20 mL/min.

99 PXRD analysis was carried out using an X-ray powder diffractometer (D8 Advance, Bruker  
100 AXS, Germany). The X-ray tube was operated at 40 kV and 40 mA with Cu K $\alpha$  radiation ( $\lambda$   
101 =1.54060 Å) at room temperature. The scans over a range of 3° - 40° (2 $\theta$ ) were obtained with a step  
102 of 0.02° and step time of 0.3 s.

103 ***In vitro* drug release.** The release profiles of DTX from DNCs and CNCs were carried out using  
104 a dialysis bag diffusion method. Briefly, 2 mL of the nanocarrier suspension (0.2 mg of DTX) was  
105 dialyzed in 30 mL of release medium (PBS containing 0.5% Tween 80, pH 7.4) using a dialysis bag  
106 with a molecular weight cutoff of 8-12 kDa. It was placed in a horizontal shaking incubator  
107 (SHA-C, Jintan, China) at 37 °C and 100 rpm of shaking speed. At designated time points, aliquots  
108 of release medium were taken out from the dialysate and replaced by an equal volume of release  
109 buffer. The DTX release from Duopafei<sup>®</sup> was measured in the same manner as a control. The  
110 concentration of DTX was determined by HPLC (LC-10ADvp pump, SPD10Avp UV-vis detector,  
111 Shimadzu Corporation, Tokyo, Japan). The chromatographic conditions were set as follows:  
112 Hypersil ODS column (4.6 mm  $\times$  250 mm, 5  $\mu$ m); mobile phase: acetonitrile-water (55:45, V/V);  
113 detection wavelength: 230 nm; injection volume: 20  $\mu$ L; flow rate: 1.0 mL/min; column  
114 temperature: 25 °C.

115 ***In vitro* leakage of C6 and Cy5-RNA from CNCs.** Briefly, 1 mL of dual fluorescence-labeled  
116 CNCs suspension were placed in two dialysis tubes with a molecular weight cutoff of 12 kDa for  
117 C6 and 50 kDa for Cy5-RNA, respectively. Then, the dialysis tubes were located in 10 mL of  
118 serum-free medium at 37 °C and under moderate shaking using a horizontal shaking incubator  
119 (SHA-C, Jintan, China). At indicated time intervals, 0.3 mL of release medium were taken out from  
120 the dialysate and replaced by an equal volume of release medium. In addition, C6 release from  
121 <sup>C6</sup>CNCs and Cy5-RNA release from CNC<sub>Cy5-RNA</sub> were also measured in the same method. The  
122 concentration of C6 and Cy5-RNA were detected using a hybrid multi-mode microplate reader  
123 (POLARstar Omega, BMG Labtech, Germany). The excitation wavelength and the emission  
124 wavelength were set at 488 nm and 520 nm for C6, 630 nm and 670 nm for Cy5-RNA, respectively.  
125 Each sample was carried out in triplicate.

126 **Caveolae-mediated cellular internalization and intracellular trafficking.** To further verify the  
127 role of caveolae in the cellular uptake of CNCs, CTB-Alexa Fluor<sup>®</sup> 488 (or 594), the pathway  
128 marker of caveolae-mediated endocytosis, was used<sup>4</sup>. Briefly, 4T1 or Caco-2 cells were seeded in  
129 glass bottom dishes (35 mm) at a density of  $1 \times 10^5$  cells/well and incubated for 24 h to allow cell  
130 attachment. To suppress caveolae-related internalization, one group of cells was pretreated with  
131 nystatin (20  $\mu$ M) for 30 min at 37 °C. Then, the cells were incubated with serum-free medium  
132 containing fluorescence-labeled CNCs and CTB-Alexa Fluor<sup>®</sup> 488 (or 594) for 4 h at 37 °C,  
133 following by washing with PBS three times, fixing with 4% formaldehyde for 10 min at room  
134 temperature, washing with PBS three times and finally visualization by CLSM.

135 To investigate the colocalization of CNCs with caveolae, anti-caveolin-1 antibody-Caveolae  
136 Marker (Alexa Fluors<sup>®</sup> 488 or 594) was used for caveolae staining<sup>5</sup>. Briefly, 4T1 or Caco-2 cells  
137 were seeded in a confocal special dish (35 mm) at a density of  $1 \times 10^5$  cells/well and cultured for 24  
138 h. One group of cells was pretreated with nystatin (20  $\mu$ M) for 30 min at 37 °C. Then, the cells were  
139 incubated with serum-free medium containing fluorescence-labeled CNCs for 4 h at 37 °C. After  
140 removing the media, washing with PBS three times, fixing with 4% formaldehyde for 10 min,  
141 permeabilization in 0.1% Triton X-100 for 5 min, and blocking with 5% BSA for 20 min at room  
142 temperature, the cells were incubated with anti-caveolin-1 antibody (Alexa Fluor<sup>®</sup> 488 or 594)  
143 overnight at 4 °C in the dark. The cells were observed by CLSM after washing with PBS.

144 To study the locations of the CNCs in the lysosomes, the distribution of the CNCs in living  
145 cells was examined by CLSM. Briefly, after incubation with fluorescence-labeled CNCs for 4 h at  
146 37 °C, removal of the media, and washing with PBS three times, the 4T1 cells were incubated with  
147 LysoTracker for 2 h at 37 °C according to the manufacturer's instructions, followed by removal of  
148 the media, PBS washing and observing by CLSM.

149 **Tumor spheroids penetration.** To investigate the penetration of CNCs in tumors, 4T1 tumor  
150 spheroids were established according to a previously reported method<sup>6</sup>. Briefly, the 96-well plates  
151 were covered with 100  $\mu$ L 2% agarose to prevent cell adhesion. Then, 4T1 cells were seeded at a  
152 density of  $1 \times 10^4$  cells/well and cultures at 37 °C for spheroids formation. After incubation for about  
153 a week, the spheroids were treated with serum-free culture media containing dual

154 fluorescence-labeled CNCs for 4 h at 37 °C. Finally, the tumor spheroids were washed with fresh  
155 PBS three times and observed by CLSM.

156 ***In vitro* RNAi experiments.** To assess the expression level of miRNA-34a, quantitative real-time  
157 polymerase chain reaction (qRT-PCR) was performed. Briefly, 4T1 cells were seeded in 6-well  
158 plates at a density of  $3 \times 10^5$  cells/well and cultured for 24 h at 37 °C. Then, the cells were  
159 transfected with DTX, BNCs, DNCs, RNCs and CNCs, respectively, for 4 h with a fixed  
160 miRNA-34a concentration of 100 nM, following by medium removing and additional incubation  
161 with fresh medium for 48 h. The total RNA was extracted from the cultured cells using Trizol  
162 reagents (Invitrogen, USA) according to the manufacturer's protocol. cDNA was obtained by  
163 reverse transcription using RevertAid First Strand cDNA Synthesis Kit (Thermo Scientific, USA).  
164 QRT-PCR was performed using an ABI Step One Plus Real-time PCR system (Applied Biosystems,  
165 USA) with SYBR<sup>®</sup> Green Real-time PCR Master Mix (TOYOBO, Japan). Twenty microliters of the  
166 reverse transcription mixture was amplified by PCR with the following program: 40 cycles at 95 °C  
167 for 15 s, 60 °C for 20 s, 72 °C for 40 s and 1 cycle at 95 °C for 15 s, 60 °C for 60 s and 95 °C for 15  
168 s. GAPDH was used as internal reference for normalization.

169 For western-blot analysis, cultured cells were lysed in lysis buffer (KeyGEN, China) by  
170 incubation on ice for 20 min. Protein was collected by the following procedure: centrifuging the  
171 cells at 12 000 rpm for 10 min, collecting supernatants, determining concentration using BCA  
172 protein assay kit (KeyGEN Biotech., China) and Varioskan spectrophotometer (Thermo, USA), and  
173 separating by SDS-PAGE. The isolated protein was then transferred onto a PVDF membrane  
174 (Millipore, USA), incubated with the blocking solution (5% non-fat dried milk) at room  
175 temperature for 1 h, treated with monoclonal antibody against Bcl-2 overnight at 4 °C, and cultured  
176 with the goat anti-mouse secondary antibody for 1 h. After staining with an ECL  
177 chemiluminescence kit (KeyGEN Biotech., China), blotting images were obtained from a G: Box  
178 Chemi XR5 (Syngene, Cambridge, UK). GAPDH was used as an internal control to normalize the  
179 protein expression.

180 **Cell cytotoxicity and apoptosis assays.** Cell cytotoxicity was assessed by the MTT method.  
181 Briefly, 4T1 cells were seeded with a density of  $5 \times 10^3$  cells/well in 96-well plates and cultured for

182 24 h for cell attachment. Then, the cells were exposed to fresh culture medium containing BNCs,  
183 DTX, DNCs, RNCs and CNCs, respectively. The concentration of miRNA-34a was fixed at 100 nM  
184 and the concentrations of DTX were set as 0.01, 0.1, 1, 10 and 50  $\mu\text{g}/\text{mL}$ . After incubation for 48 h,  
185 20  $\mu\text{L}$  MTT (5 mg/mL) was added to each well, and the cells were incubated for an additional 4 h.  
186 The medium was removed, and then, 200  $\mu\text{L}$  of dimethyl sulfoxide (DMSO) was added to each well  
187 to dissolve formazan crystals. Finally, the absorbance at 570 nm was measured using a Microplate  
188 Reader (Multiskan FC, USA). The cell viability was calculated by the following formula: Cell  
189 viability (%) =  $(A_{\text{sample}} - A_{\text{blank}}) / (A_{\text{control}} - A_{\text{blank}}) \times 100\%$ , where  $A_{\text{sample}}$ ,  $A_{\text{blank}}$ , and  $A_{\text{control}}$  were the  
190 absorbance of the cells treated with the formulations, the culture media without the cells, and the  
191 cells without treatment.

192 Cell apoptosis was evaluated by the cell nuclear morphology after DAPI staining and  
193 AnnexinV-FITC/PI apoptosis detection kits, respectively. 4T1 cells were treated with fresh culture  
194 media containing DTX, BNCs, DNCs, RNCs and CNCs (10  $\mu\text{g}/\text{mL}$  of DTX or 100 nM of  
195 miRNA-34a) for 48 h, respectively. The cells were washed three times with PBS, stained with  
196 DAPI at room temperature for 10 min, and observed by an inverted fluorescence microscope  
197 (Olympus IX53, Japan). Cell apoptosis was evaluated according to the nuclear morphology changes,  
198 such as chromatin condensation, fragmentation and apoptotic body formation. For quantitative  
199 analysis of cell apoptosis, AnnexinV-FITC/PI apoptosis detection kits and FCM were employed for  
200 determination. Cells were treated as described above, harvested after incubation with drug  
201 formulations, processed according to the manufacturer's protocol, and finally determined by FCM.

202 ***In vitro* transwell migration assay.** The migration assay was performed using transwell  
203 chambers with a pore size of 8  $\mu\text{m}$  (Corning, USA)<sup>7</sup>. Briefly, 4T1 cells were seeded in 6-well plates  
204 at a density of  $5 \times 10^5$  cells/well and cultured for 24 h. Then, the cells were treated with serum-free  
205 culture media containing with DTX, BNCs, DNCs, RNCs and CNCs (10  $\mu\text{g}/\text{mL}$  of DTX or 100 nM  
206 of miRNA-34a) for 24 h, respectively. After washing with PBS, harvesting and suspending in  
207 serum-free medium, 200  $\mu\text{L}$  of the cell suspension was placed into the top chamber at a density of  
208  $1 \times 10^5$  cells/chamber, and 500  $\mu\text{L}$  of RPMI 1640 medium containing 20% FBS as a chemoattractant  
209 was added to the lower chamber. After incubation for 24 h at 37  $^{\circ}\text{C}$ , the cells in the upper chambers



210 were scraped off with a cotton swab; the migrated cells on the lower surface were fixed with 70%  
211 ethanol for 30 min, stained with 0.25% crystal violet for 15 min at room temperature, and washed  
212 with fresh PBS three times. Cell migration images were obtained using an inverted fluorescence  
213 microscope (Olympus IX53, Japan). Thereafter, the transwell inserts were incubated in 33% acetic  
214 acid to dissolve the crystal violet completely. To quantitatively detect the amounts of migrating cells,  
215 the absorbance (OD values) at 600 nm was measured using a Microplate Reader (Multiskan FC,  
216 USA). The cell migration rate was calculated by the following formula: Cell migration rate (%) =  
217  $OD_{\text{sample}}/OD_{\text{control}} \times 100\%$ , where  $OD_{\text{sample}}$  and  $OD_{\text{control}}$  were the absorbance of the migrating cells  
218 with treatment of different formulations and the migrating cells without treatment, respectively.

219 **Pharmacokinetics in rats.** The animals used in the experiments received care in compliance with  
220 the Principles of Laboratory Animal Care and the Guide for the Care and Use of Laboratory  
221 Animals. All the animal experiments were performed in accordance with the protocol approved by  
222 the China Pharmaceutical University Institutional Animal Care and Use Committee.

223 SD rats were randomly divided into two groups ( $n = 3$ ) and then injected via the tail vein with  
224 Duopafei<sup>®</sup> and DNCs at a dose of 10 mg/kg DTX, respectively. Approximately 0.5 mL of blood  
225 samples were collected from rat orbit at predetermined time intervals (0.083, 0.25, 0.5, 1, 2, 4, 6, 8,  
226 10 and 12 h), and plasma samples were obtained after centrifugation, extraction with ethyl ether and  
227 redissolution with methanol. The concentration of DTX was measured by HPLC. The  
228 pharmacokinetic parameters were calculated by Debris Assessment Software version 2.0 (DAS 2.0,  
229 NASA Orbital Debris Program Office, Houston, TX).

230 ***In vivo* imaging and biodistribution.** 4T1 tumor-bearing mice models were established by  
231 subcutaneous injection of 0.1 mL PBS containing  $1 \times 10^6$  4T1 cells at the right axilla of BALB/c  
232 mice. The mice were used in the experiments when the tumor volume reached approximately 500  
233  $\text{mm}^3$ . Dual fluorescence-labeled CNCs (loaded with C6 and Cy5-RNA) were injected via the tail  
234 vein at a C6 dose of 2 mg/kg and Cy5-RNA dose of 1 mg/kg with free C6 and free Cy5-RNA as  
235 controls<sup>8-10</sup>. The *in vivo* fluorescence signals were detected using an *in vivo* imaging system (FX  
236 PRO, Kodak, USA) at predetermined intervals (1 h, 4 h, 8 h and 24 h). To detect the fluorescence  
237 intensity, the bandpass filter was fixed at excitation wavelengths of 470 nm and 630 nm and

238 emission wavelengths of 530 nm and 670 nm for C6 and Cy5, respectively. To further investigate  
239 the biodistribution of the CNCs, the mice were sacrificed at the indicated time after administration  
240 to collect the tumor, heart, liver, spleen, lung and kidney for imaging.

241 To further confirm the distribution of the CNCs in the tumors, the tumor tissues were excised  
242 from the mice at 4 h post-injection of dual fluorescence-labeled CNCs. The sample for CLSM  
243 observation was prepared as follows: freeze the excised tumor tissue, cut into sections (6-8  $\mu\text{m}$ )  
244 using a microtome (Leica CM1860, Germany) and stain with DAPI. For the TEM examination, the  
245 procedure for sample preparation was followed by cutting the isolated tumor tissue into small  
246 blocks with a volume of approximately 1  $\text{mm}^3$ , fixing in 2.5% glutaraldehyde overnight,  
247 dehydration, penetration, embedding, preparing thin sections (approximately 50 nm) and staining  
248 with uranyl acetate and lead citrate.

249 ***In vivo* safety study.** Normal BALB/c mice were randomly divided into six groups ( $n = 5$ ) and  
250 injected with different formulations (saline, Duopafei<sup>®</sup>, BNCs, DNCs, RNCs and CNCs) by the  
251 same administration schedule as described in the *in vivo* antitumor experiments. The mice were  
252 sacrificed after administration, and the main organs including hearts, livers, spleens, lungs and  
253 kidneys were harvested for H&E and CD68 immunohistochemical analysis.

## 254 **References**

- 255 1 Lu, W. *et al.* Cationic albumin-conjugated pegylated nanoparticles as novel drug carrier for  
256 brain delivery. *J Control Release* **107**, 428-448 (2005).
- 257 2 Jiang, Y. *et al.* Direct cytosolic delivery of siRNA using nanoparticle-stabilized nanocapsules.  
258 *Angew Chem Int Ed Engl* **54**, 506-510 (2015).
- 259 3 Han, J., Wang, Q., Zhang, Z., Gong, T. & Sun, X. Cationic bovine serum albumin based  
260 self-assembled nanoparticles as siRNA delivery vector for treating lung metastatic cancer.  
261 *Small* **10**, 524-535 (2014).
- 262 4 Song, Q. *et al.* Cellular internalization pathway and transcellular transport of pegylated  
263 polyester nanoparticles in Caco-2 cells. *Int J Pharm* **445**, 58-68 (2013).
- 264 5 Tiruppathi, C. *et al.* Albumin mediates the transcytosis of myeloperoxidase by means of  
265 caveolae in endothelial cells. *Proc Natl Acad Sci U S A* **101**, 7699-7704 (2004).
- 266 6 Zhu, L., Wang, T., Perche, F., Taigind, A. & Torchilin, V. P. Enhanced anticancer activity of  
267 nanopreparation containing an MMP2-sensitive PEG-drug conjugate and cell-penetrating  
268 moiety. *Proc Natl Acad Sci U S A* **110**, 17047-17052 (2013).

- 269 7 Zheng, Y. *et al.* CA1 contributes to microcalcification and tumourigenesis in breast cancer.  
270 *BMC Cancer* **15**, 679 (2015).
- 271 8 Yin, T., Wang, L., Yin, L., Zhou, J. & Huo, M. Co-delivery of hydrophobic paclitaxel and  
272 hydrophilic AURKA specific siRNA by redox-sensitive micelles for effective treatment of  
273 breast cancer. *Biomaterials* **61**, 10-25 (2015).
- 274 9 Shi, S. *et al.* Dual drugs (microRNA-34a and paclitaxel)-loaded functional solid lipid  
275 nanoparticles for synergistic cancer cell suppression. *J Control Release* **194**, 228-237 (2014).
- 276 10 Tang, S. *et al.* Tumor - Microenvironment - Adaptive Nanoparticles Codeliver Paclitaxel and  
277 siRNA to Inhibit Growth and Lung Metastasis of Breast Cancer. *Adv Funct Mater* (2016).
- 278 11 Naik, S., Patel, D., Surti, N. & Misra, A. Preparation of PEGylated liposomes of docetaxel  
279 using supercritical fluid technology. *J Supercrit Fluid* **54**, 110-119 (2010).

280

281

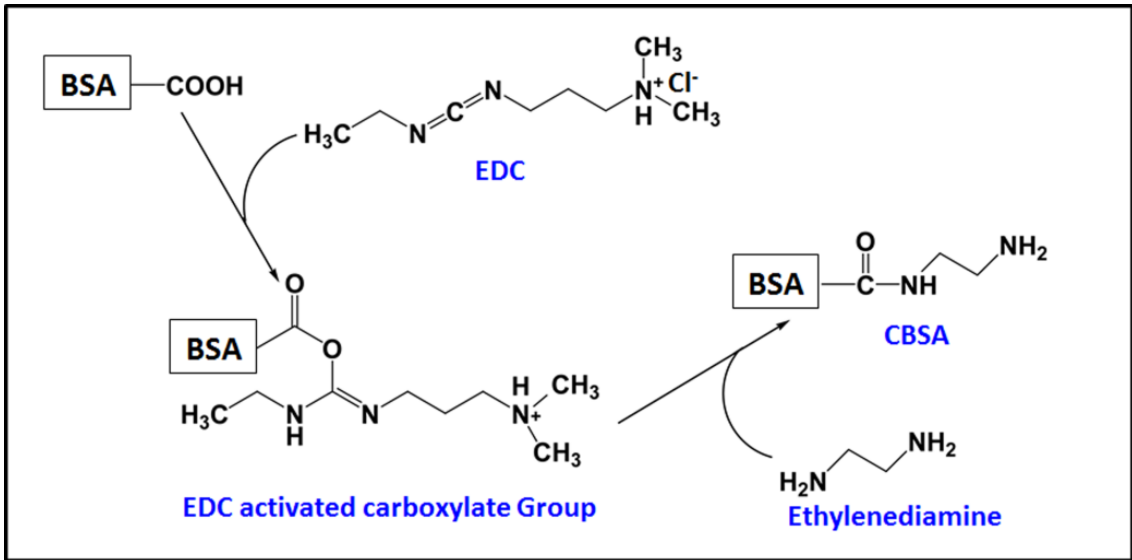

282

283

284

Fig. S1 Synthesis scheme of CBSA.

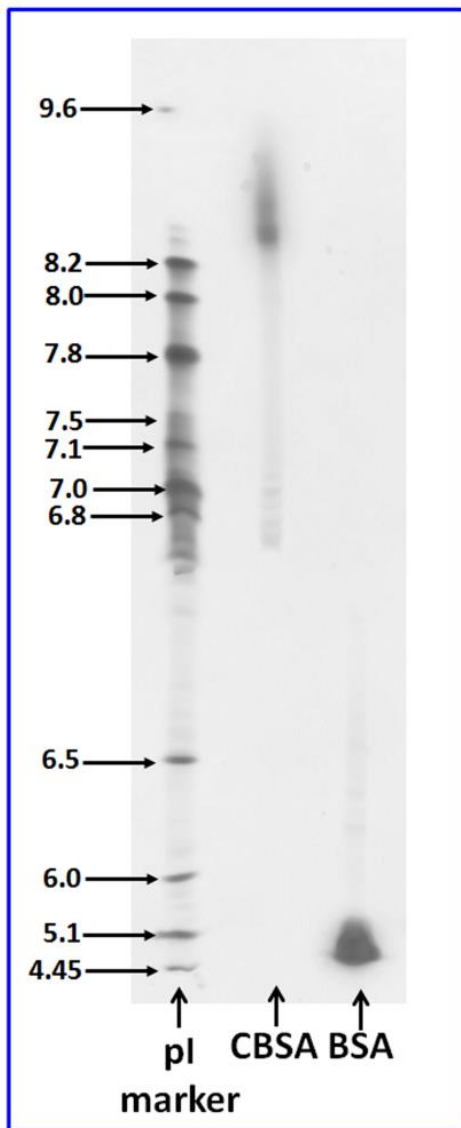

285

286 **Fig. S2** IEF diagram of BSA and CBSA. The pI values of BSA and CBSA were 4.6 and 8-9,  
 287 respectively.

288

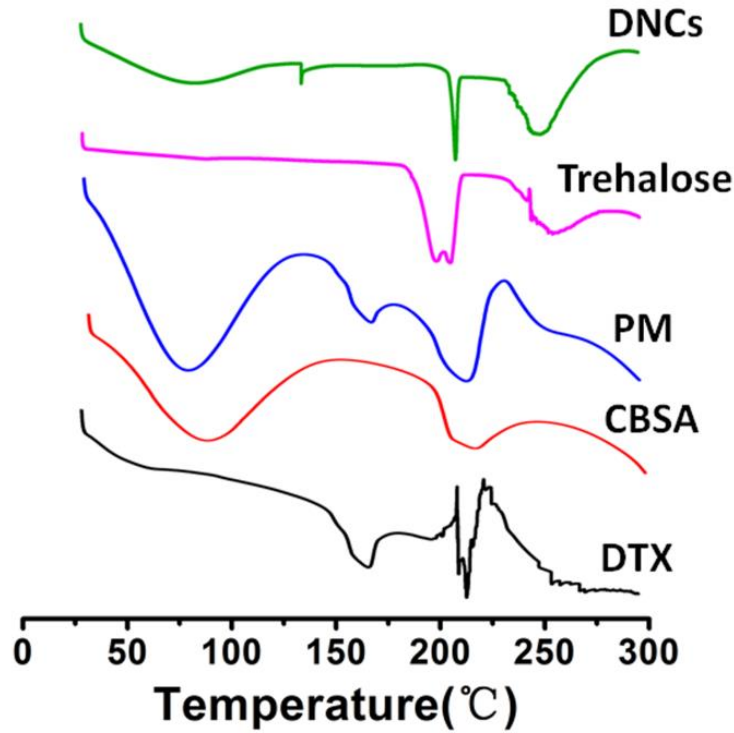

289

290 **Fig. S3** DSC analysis of pure DTX, CBSA, their physical mixture (PM), trehalose and  
 291 freeze-dried DNCs. DTX showed two strong endothermic melting peaks at 167.9 °C and 211.4 °C,  
 292 which is consistent with the previously reported results.<sup>11</sup> CBSA was amorphous macromolecular  
 293 protein; thus, it showed two broad peaks. The PM sample also possessed the two characteristic  
 294 diffraction peaks of DTX. Trehalose, the protectant during freezing, showed melting peaks from  
 295 200 °C to 206 °C. For the DSC thermograms of freeze-dried DNCs, the characteristic peak of DTX  
 296 at 167.9 °C was absent, indicating that DTX in nanocarriers was in the amorphous phase of a  
 297 molecular dispersion and thus was well encapsulated in the cores of DNCs.

298

299

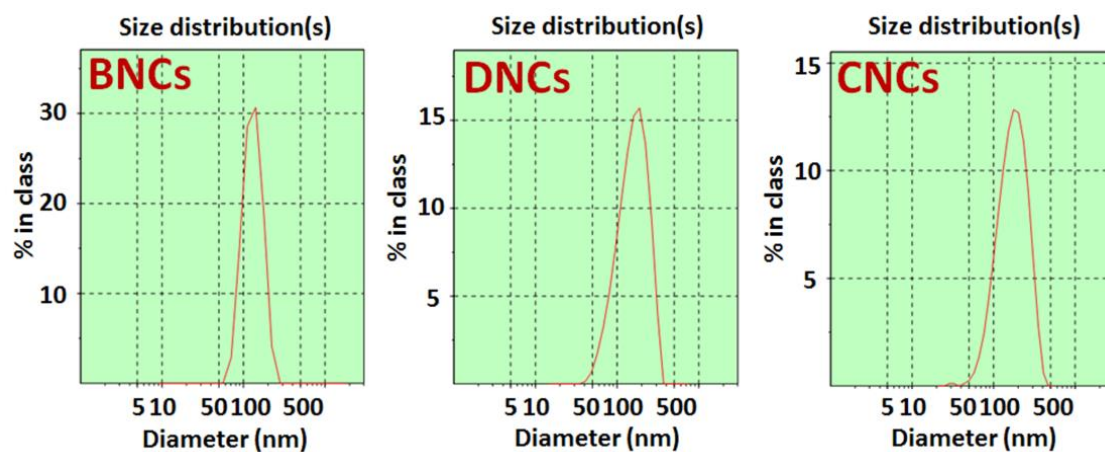

300

301 **Fig. S4** Size distributions of the BNCs, DNCs and CNCs determined by dynamic light scattering  
 302 (DLS).

303

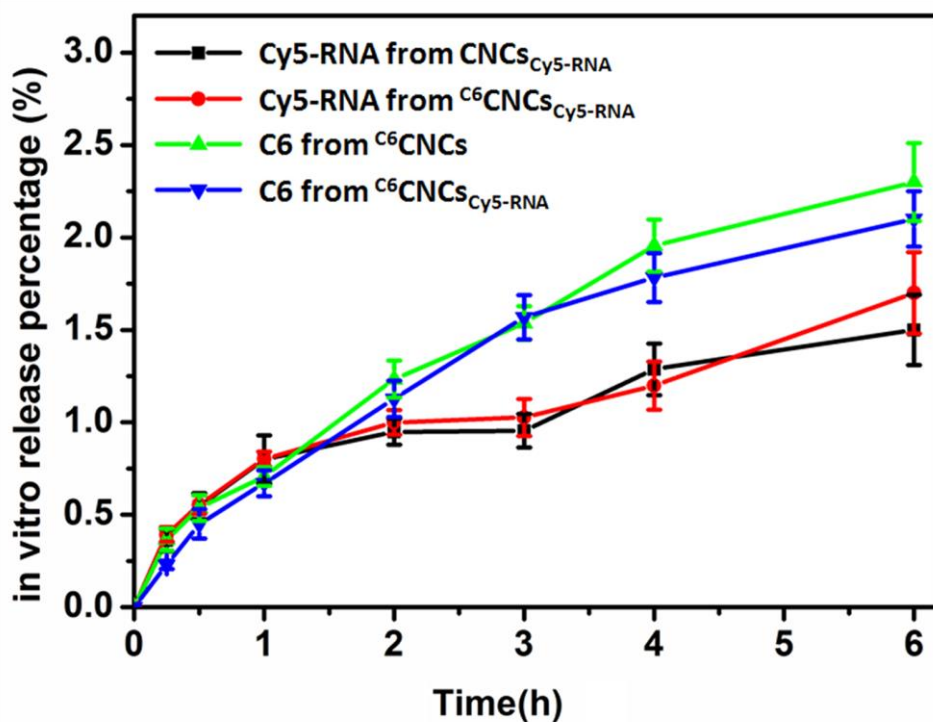

304

305 **Fig. S5** *In vitro* leakage of C6 and Cy5-RNA from CNCs in serum-free medium at 37 °C. <sup>C6</sup>CNCs:  
 306 C6-loaded CNCs; CNCs<sub>Cy5-RNA</sub>: Cy5-RNA loaded CNCs; <sup>C6</sup>CNCs<sub>Cy5-RNA</sub>: C6 and Cy5-RNA dual  
 307 fluorescence-labeled CNCs.

308

309



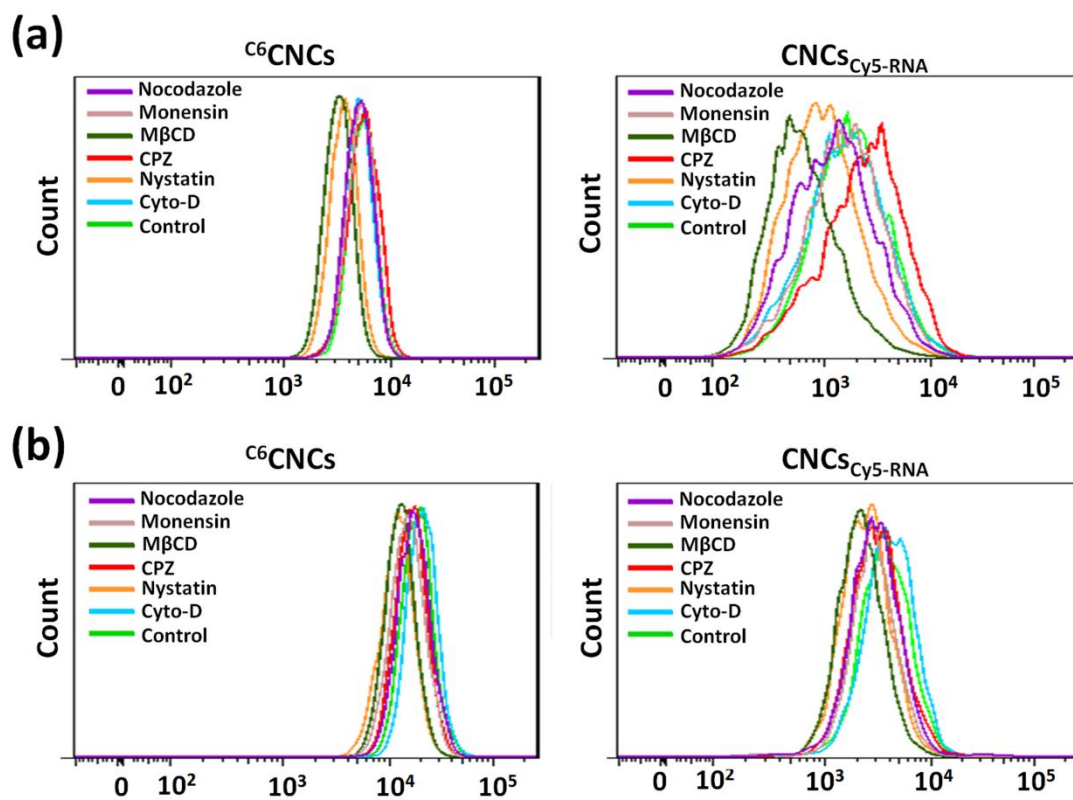

310

311 **Fig. S6** FCM results of the cell uptake of CNCs in (a) 4T1 cells and (b) Caco-2 cells pretreated  
 312 with various endocytosis inhibitors.

313

314

315

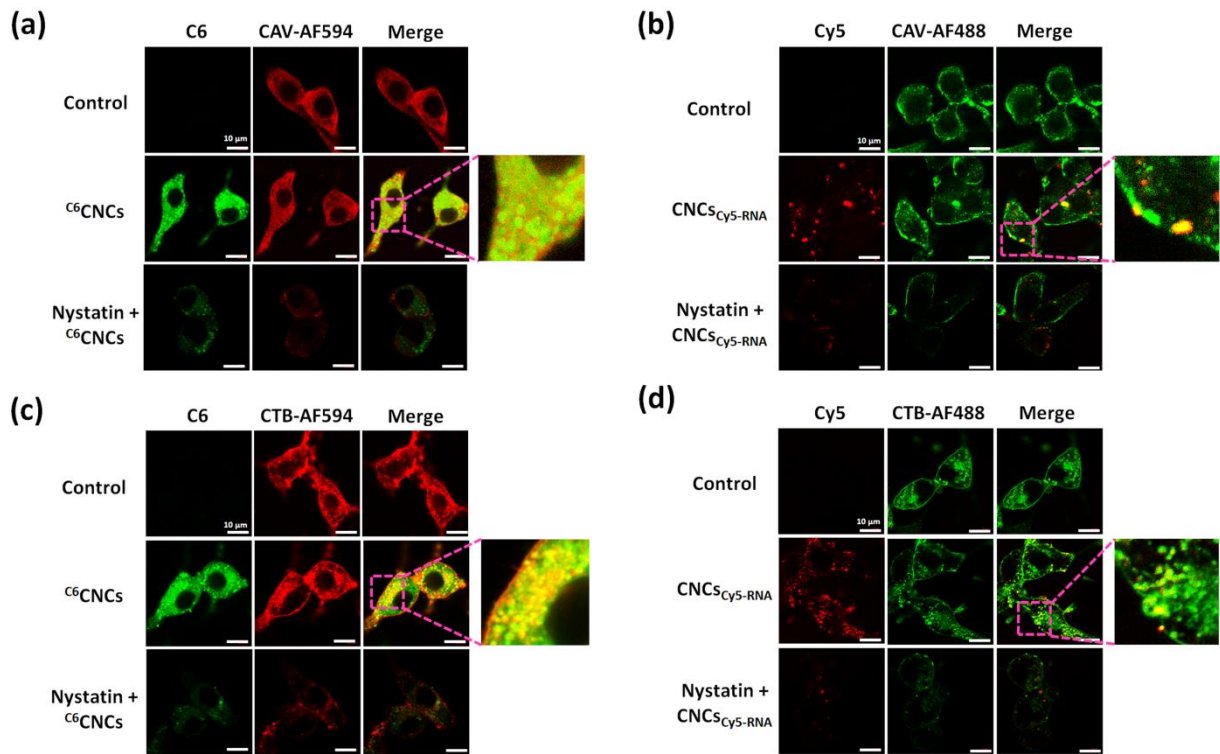

316

317 **Fig. S7** Caveolae-mediated cellular internalization of CNCs in Caco-2 cells. Colocalization of (a)  
 318  $^{C6}$ CNCs or (b)  $CNCs_{Cy5-RNA}$  with Caveolin-1 (CAV-1) after incubation for 4 h at 37 °C in the  
 319 absence or presence of nystatin. CNCs were labeled by C6 (green) or Cy5-RNA (red). CAV-1 was  
 320 marked by anti-caveolin-1 antibody/Alexa Fluors<sup>®</sup> 594 (red) or 488 (green). Colocalization of (c)  
 321  $^{C6}$ CNCs or (d)  $CNCs_{Cy5-RNA}$  with CTB-Alexa Fluors<sup>®</sup> 594 (red) or 488 (green) after incubation for 4  
 322 h at 37 °C in the absence or presence of nystatin. Yellow spots indicate the colocalization of CNCs  
 323 with caveolae or CTB. Caco-2 cells without treatment were used as control. Scale bar: 10 μm

324

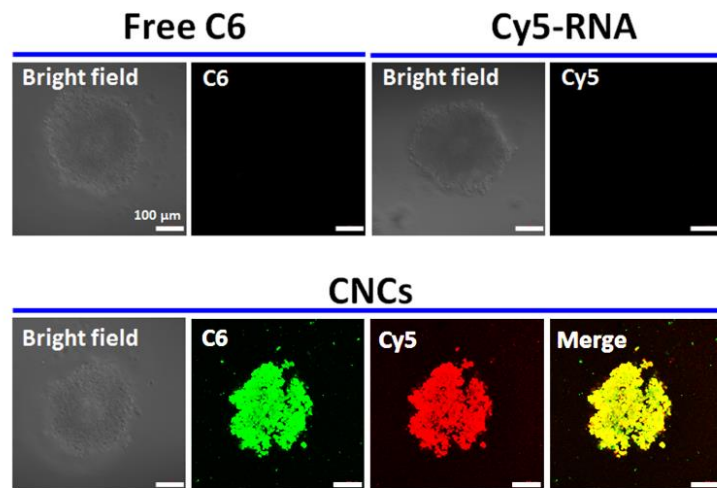

325

326 **Fig. S8** *In vitro* penetration of CNCs in 4T1 tumor spheroids after incubation for 4 h at 37 °C.

327 CLSM images were obtained from the equatorial plane of the tumor spheroids. Scale bar: 100 μm.

328

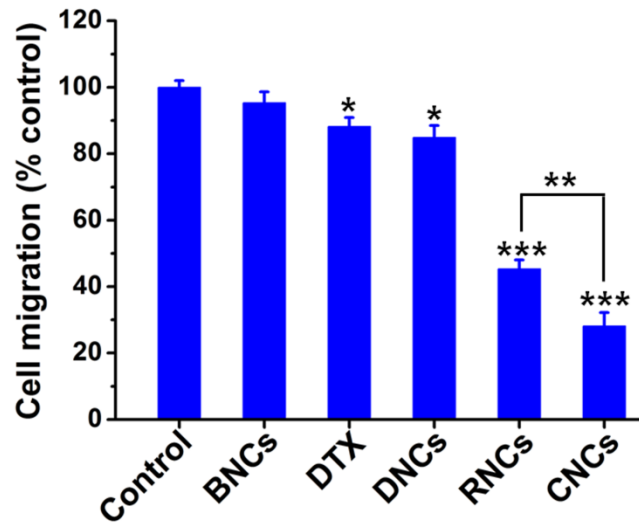

329

330 **Fig. S9** Quantitative analysis of the inhibition migration of 4T1 cells examined by transwell  
 331 chamber assay. The migrated cells were represented by the absorbance of crystal violet measured at  
 332 600 nm. The cell migration of the control group was set as 100%. \*P < 0.05, \*\*P < 0.01, \*\*\*P < 0.001  
 333 versus control.

334

335

336

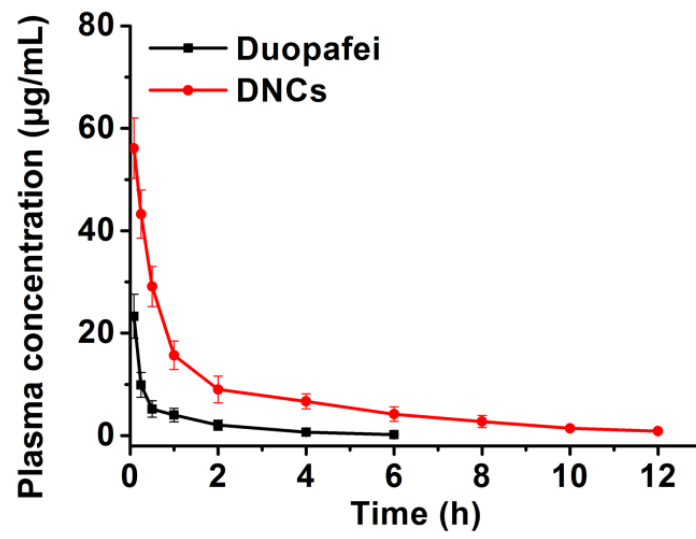

337

338 **Fig. S10** The mean plasma concentration–time curves of DTX after intravenous injection of  
339 Duopafei<sup>®</sup> and DNCs at a dose of 10 mg/kg in SD rats (n = 3).

340

341

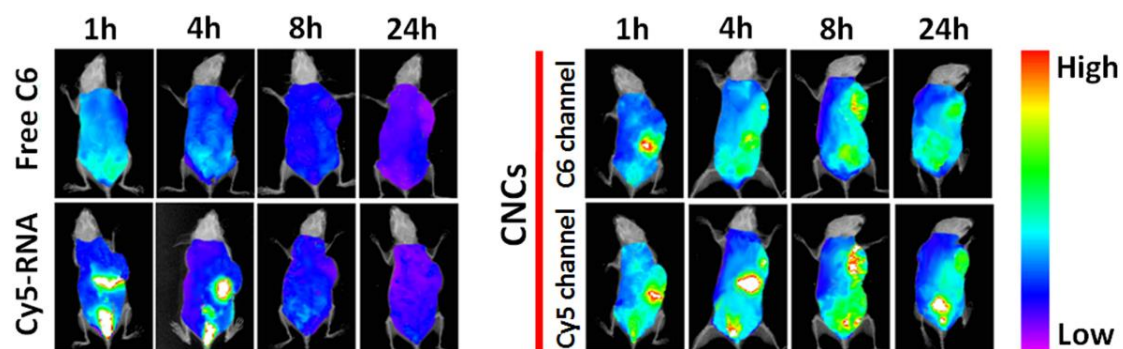

342

343 **Fig. S11** *In vivo* imaging of free C6, Cy5-RNA and dual fluorescence-labeled CNCs in 4T1-tumor  
 344 bearing mice models. Dual fluorescence-labeled CNCs were prepared by loading C6 (green) in the  
 345 cores and Cy5-RNA (red) in the shells of CNCs.

346

347

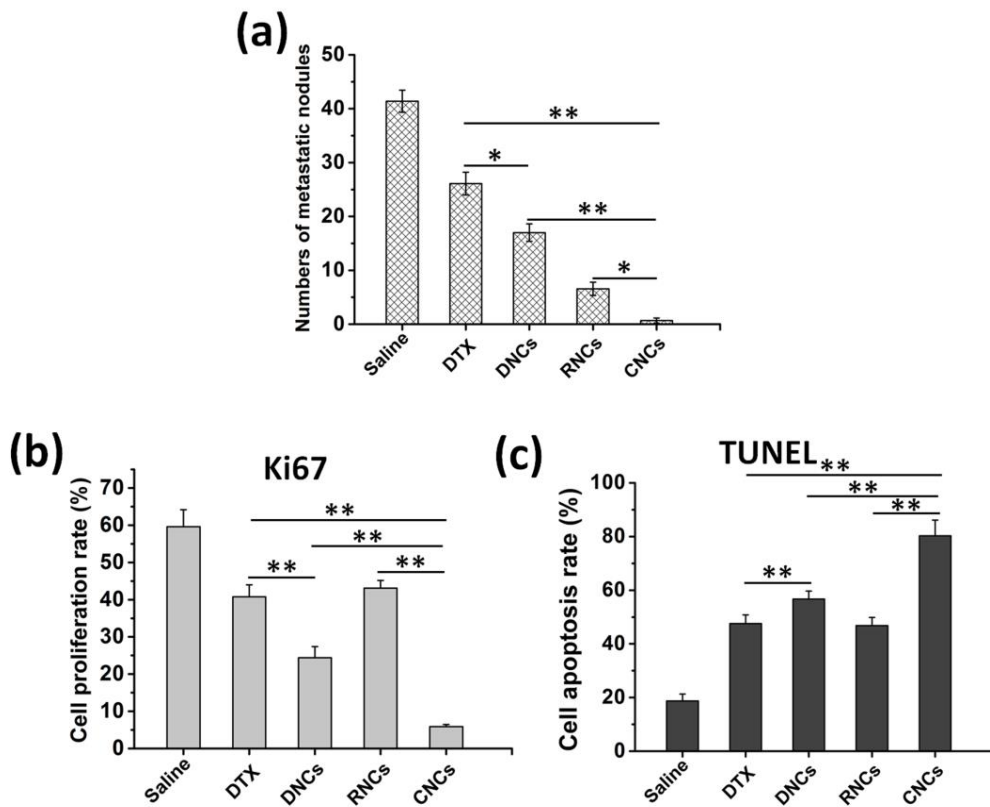

348

349 **Fig. S12** (a) Quantitative analysis of the metastatic nodules in lungs. (b) Quantitative analysis of  
 350 cell proliferation from Ki67 assays. (c) Quantitative analysis of cell apoptosis from TUNEL assays.

351 \*P<0.05, \*\*P<0.01, \*\*\*P<0.001.

352

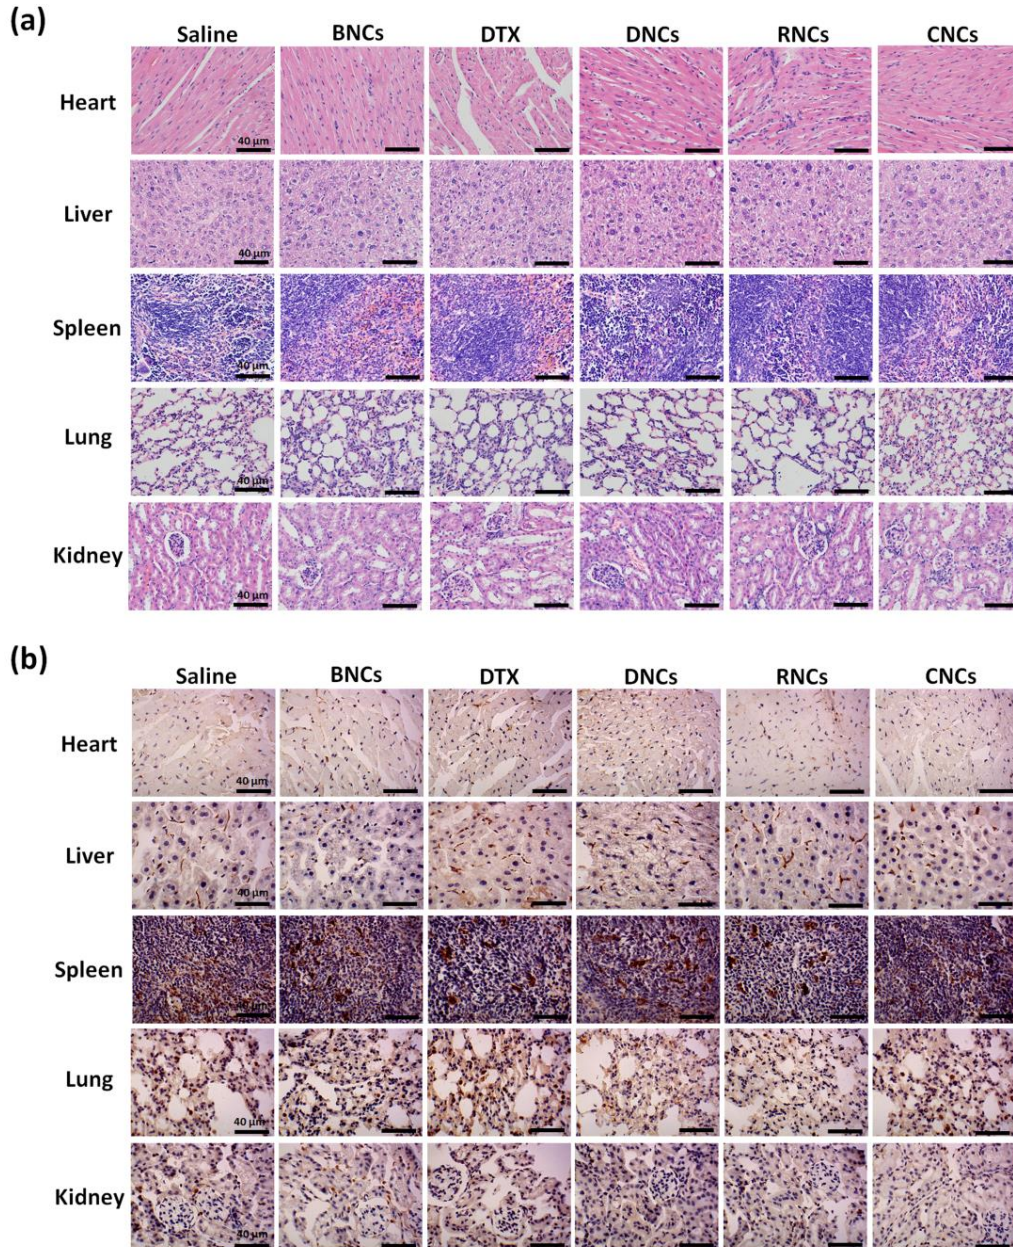

353

354 **Fig. S13** *In vivo* safety studies. (a) Histological examination of major organs harvested from  
 355 normal mice after treatment with saline, BNCs, DTX, DNCs, RNCs and CNCs. Scale bar: 40  $\mu$ m.

356 (b) CD68 immunohistochemical assay of major organs harvested from normal mice after treatment  
 357 with saline, BNCs, DTX, DNCs, RNCs and CNCs (400 $\times$ ). Scale bar: 40  $\mu$ m.

358



359 **Table S1** Particle size, polydispersity index (PDI) and zeta potential of the BNCs, DNCs and  
360 CNCs.

|                     | <b>BNCs</b>   | <b>DNCs</b>   | <b>CNCs</b>   |
|---------------------|---------------|---------------|---------------|
| Size (nm)           | 155.3 ± 3.5   | 171.1 ± 5.3   | 183.9 ± 2.8   |
| PDI                 | 0.176 ± 0.034 | 0.191 ± 0.017 | 0.195 ± 0.012 |
| Zeta potential (mV) | 28.87 ± 4.94  | 28.49 ± 3.97  | 23.37 ± 3.89  |

361

362

363 **Table S2** Pharmacokinetic parameters of DTX after intravenous injection of Duopafei<sup>®</sup> and  
364 DNCs at a dose of 10 mg/kg in SD rats (n = 3).

365

| Pharmacokinetic parameters  | Formulations          |               |
|-----------------------------|-----------------------|---------------|
|                             | Duopafei <sup>®</sup> | DNCs          |
| $t_{1/2}$ (h)               | 1.17 ± 0.14           | 3.52 ± 0.26   |
| AUC <sub>0-∞</sub> (mg h/L) | 15.99 ± 2.31          | 93.15 ± 5.63  |
| MRT <sub>0-∞</sub> (h)      | 1.25 ± 0.34           | 3.423 ± 0.29  |
| CL (L/h/kg)                 | 0.625 ± 0.073         | 0.107 ± 0.044 |

366
